# Supplementary material
Source: PubMed Central journal article supplement (PMC4451294)
Supplement: Appendix.pdf [file Appendix.pdf]

Appendix:

## Prior head-down tilt does not impair the cerebrovascular response to head-up tilt

Changbin Yang<sup>1,2\*</sup>, Yuan Gao<sup>1\*</sup>, Danielle K. Greaves<sup>2</sup>, Rodrigo Villar<sup>2</sup>, Thomas Beltrame<sup>2</sup>, Katelyn S. Fraser<sup>2</sup>, Richard L. Hughson<sup>2</sup>

<sup>1</sup> School of Aerospace Medicine, Fourth Military Medical University, Xi'an, China;

<sup>2</sup> Schlegel-University of Waterloo Research Institute for Aging, Waterloo, Canada;

**Table A1 – Comparison during HDT:** Main effects and interactions from two-way repeated measures analysis of variance (ANOVA), statistical power and selected post-hoc comparisons for variables measured during baseline supine (BL, time = 0) and two periods of HDT (HDT1, HDT2, time = 0-7s and 8-15s) at three different angles (-10°, -25° and -55°). Only statistically significant comparisons are displayed for Time of HUT (5, 10, 15, 20, 40, 60s) within the Condition, or for Condition at any Time of HUT.

| P-values for main effects and interactions during HDT |       |                   |        |       |        |       |                 |        |                               |
|-------------------------------------------------------|-------|-------------------|--------|-------|--------|-------|-----------------|--------|-------------------------------|
|                                                       | MFV   | BP <sub>MCA</sub> | CVRi   | HR    | MAP    | SV    | Q <sub>MF</sub> | TPRi   | P <sub>ETCO<sub>2</sub></sub> |
| Condition                                             | 0.003 | <0.001            | <0.001 | 0.069 | 0.038  | 0.037 | 0.011           | 0.049  | 0.163                         |
| Time of HDT                                           | 0.062 | <0.001            | <0.001 | 0.001 | <0.001 | 0.218 | <0.001          | <0.001 | 0.570                         |
| Condition * Time of HDT                               | 0.164 | <0.001            | <0.001 | 0.002 | 0.613  | 0.002 | <0.001          | <0.001 | .562                          |
|                                                       |       |                   |        |       |        |       |                 |        |                               |
| Power of performed test                               |       |                   |        |       |        |       |                 |        |                               |
| Condition                                             | 0.902 | 1                 | 1      | 0.366 | 0.494  | 0.499 | 0.731           | 0.439  | 0.191                         |
| Time of HDT                                           | 0.389 | 1                 | 1      | 0.959 | 0.998  | 0.139 | 0.999           | 0.998  | 0.05                          |
| Condition * Time of HDT                               | 0.209 | 1                 | 1      | 0.904 | 0.05   | 0.913 | 1               | 0.999  | 0.05                          |

Abbreviations: MFV = middle cerebral artery mean flow velocity; BP<sub>MCA</sub> = blood pressure at the level of the middle cerebral artery; HR = heart rate; MAP = mean arterial pressure; SV = stroke volume; Q<sub>MF</sub> = cardiac output by Modelflow; TPRi = total peripheral resistance index calculated as MAP / CO.

### Mean Flow Velocity

Comparisons for factor: **Condition for Prior HDT**

| Comparison          | Diff of Means | t     | P     | P<0.050 |
|---------------------|---------------|-------|-------|---------|
| -10.000 vs. -55.000 | 5.875         | 3.983 | 0.003 | Yes     |
| -10.000 vs. -25.000 | 4.072         | 2.760 | 0.026 | Yes     |

### BP<sub>MCA</sub>

Comparisons for factor: **Time of HDT within Prior HDT=-10**

| <b>Comparison</b> | <b>Diff of Means</b> | <b>t</b> | <b>P</b> | <b>P&lt;0.05</b> |
|-------------------|----------------------|----------|----------|------------------|
| BL vs. HDT1       | 6.800                | 5.440    | <0.001   | Yes              |
| HDT1 vs. HDT2     | 3.443                | 2.755    | 0.018    | Yes              |
| BL vs. HDT2       | 3.356                | 2.686    | 0.011    | Yes              |

Comparisons for factor: **Time of HDT within Prior HDT=-25**

| <b>Comparison</b> | <b>Diff of Means</b> | <b>t</b> | <b>P</b> | <b>P&lt;0.05</b> |
|-------------------|----------------------|----------|----------|------------------|
| BL vs. HDT1       | 14.551               | 11.643   | <0.001   | Yes              |
| BL vs. HDT2       | 9.784                | 7.829    | <0.001   | Yes              |
| HDT1 vs. HDT2     | 4.767                | 3.814    | <0.001   | Yes              |

Comparisons for factor: **Time of HDT within Prior HDT=-55**

| <b>Comparison</b> | <b>Diff of Means</b> | <b>t</b> | <b>P</b> | <b>P&lt;0.05</b> |
|-------------------|----------------------|----------|----------|------------------|
| BL vs. HDT1       | 28.133               | 22.509   | <0.001   | Yes              |
| BL vs. HDT2       | 22.885               | 18.310   | <0.001   | Yes              |
| HDT1 vs. HDT2     | 5.248                | 4.199    | <0.001   | Yes              |

Comparisons for factor: **Condition within Time=HDT1**

| <b>Comparison</b>   | <b>Diff of Means</b> | <b>t</b> | <b>P</b> | <b>P&lt;0.05</b> |
|---------------------|----------------------|----------|----------|------------------|
| -55.000 vs. -10.000 | 19.355               | 18.148   | <0.001   | Yes              |
| -55.000 vs. -25.000 | 12.509               | 11.729   | <0.001   | Yes              |
| -25.000 vs. -10.000 | 6.846                | 6.419    | <0.001   | Yes              |

Comparisons for factor: **Condition within Time=HDT2**

| <b>Comparison</b>   | <b>Diff of Means</b> | <b>t</b> | <b>P</b> | <b>P&lt;0.05</b> |
|---------------------|----------------------|----------|----------|------------------|
| -55.000 vs. -10.000 | 17.551               | 16.456   | <0.001   | Yes              |
| -55.000 vs. -25.000 | 12.028               | 11.278   | <0.001   | Yes              |
| -25.000 vs. -10.000 | 5.522                | 5.178    | <0.001   | Yes              |

## **Cerebrovascular Resistance index (CVRi)**

Comparisons for factor: **Time of HDT within Prior HDT=-25**

| <b>Comparison</b> | <b>Diff of Means</b> | <b>t</b> | <b>P</b> | <b>P&lt;0.05</b> |
|-------------------|----------------------|----------|----------|------------------|
| 2.000 vs. 0.000   | 0.228                | 5.378    | <0.001   | Yes              |
| 1.000 vs. 0.000   | 0.216                | 5.101    | <0.001   | Yes              |

Comparisons for factor: **Time of HDT within Prior HDT=-55**

| <b>Comparison</b> | <b>Diff of Means</b> | <b>t</b> | <b>P</b> | <b>P&lt;0.05</b> |
|-------------------|----------------------|----------|----------|------------------|
| 1.000 vs. 0.000   | 0.527                | 12.430   | <0.001   | Yes              |

|                 |       |       |        |     |
|-----------------|-------|-------|--------|-----|
| 2.000 vs. 0.000 | 0.415 | 9.790 | <0.001 | Yes |
| 1.000 vs. 2.000 | 0.112 | 2.640 | 0.011  | Yes |

Comparisons for factor: **Condition within Time=HDT1**

| <b>Comparison</b>   | <b>Diff of Means</b> | <b>t</b> | <b>P</b> | <b>P&lt;0.05</b> |
|---------------------|----------------------|----------|----------|------------------|
| -55.000 vs. -10.000 | 0.553                | 9.250    | <0.001   | Yes              |
| -55.000 vs. -25.000 | 0.335                | 5.601    | <0.001   | Yes              |
| -25.000 vs. -10.000 | 0.218                | 3.649    | <0.001   | Yes              |

Comparisons for factor: **Condition within Time=HDT2**

| <b>Comparison</b>   | <b>Diff of Means</b> | <b>t</b> | <b>P</b> | <b>P&lt;0.05</b> |
|---------------------|----------------------|----------|----------|------------------|
| -55.000 vs. -10.000 | 0.450                | 7.525    | <0.001   | Yes              |
| -25.000 vs. -10.000 | 0.239                | 3.994    | <0.001   | Yes              |
| -55.000 vs. -25.000 | 0.211                | 3.531    | 0.001    | Yes              |

## **Heart Rate**

Comparisons for factor: **Time of HDT within Prior HDT=-25**

| <b>Comparison</b> | <b>Diff of Means</b> | <b>t</b> | <b>P</b> | <b>P&lt;0.05</b> |
|-------------------|----------------------|----------|----------|------------------|
| BL vs. HDT2       | 3.685                | 3.175    | 0.008    | Yes              |
| BL vs. HDT1       | 3.668                | 3.160    | 0.006    | Yes              |

Comparisons for factor: **Time of HDT within Prior HDT=-55**

| <b>Comparison</b> | <b>Diff of Means</b> | <b>t</b> | <b>P</b> | <b>P&lt;0.05</b> |
|-------------------|----------------------|----------|----------|------------------|
| BL vs. HDT1       | 6.361                | 5.480    | <0.001   | Yes              |
| BL vs. HDT2       | 5.178                | 4.461    | <0.001   | Yes              |

Comparisons for factor: **Condition within Time=HDT1**

| <b>Comparison</b>   | <b>Diff of Means</b> | <b>t</b> | <b>P</b> | <b>P&lt;0.05</b> |
|---------------------|----------------------|----------|----------|------------------|
| -10.000 vs. -55.000 | 4.785                | 3.296    | 0.007    | Yes              |

Comparisons for factor: **Condition within Time=HDT2**

| <b>Comparison</b>   | <b>Diff of Means</b> | <b>t</b> | <b>P</b> | <b>P&lt;0.05</b> |
|---------------------|----------------------|----------|----------|------------------|
| -10.000 vs. -55.000 | 4.762                | 3.280    | 0.008    | Yes              |

## **Mean Arterial Pressure**

Comparisons for factor: **Time of HDT**

| Comparison    | Diff of Means | t     | P      | P<0.050 |
|---------------|---------------|-------|--------|---------|
| HDT1 vs. HDT2 | 4.512         | 5.515 | <0.001 | Yes     |
| BL vs. HDT1   | 2.911         | 3.558 | 0.004  | Yes     |

Comparisons for factor: **Condition for Prior HDT**

| Comparison          | Diff of Means | t     | P     | P<0.050 |
|---------------------|---------------|-------|-------|---------|
| -10.000 vs. -55.000 | 2.151         | 2.758 | 0.038 | Yes     |

## **Stroke Volume**

Comparisons for factor: **Time of HDT within Prior HDT=-55**

| Comparison  | Diff of Means | t     | P     | P<0.05 |
|-------------|---------------|-------|-------|--------|
| BL vs. HDT1 | 4.283         | 3.128 | 0.011 | Yes    |
| BL vs. HDT2 | 3.792         | 2.769 | 0.018 | Yes    |

Comparisons for factor: **Condition within Time=HDT1**

| Comparison          | Diff of Means | t     | P     | P<0.05 |
|---------------------|---------------|-------|-------|--------|
| -10.000 vs. -55.000 | 4.147         | 2.877 | 0.021 | Yes    |

Comparisons for factor: **Condition within Time=HDT2**

| Comparison          | Diff of Means | t     | P     | P<0.05 |
|---------------------|---------------|-------|-------|--------|
| -10.000 vs. -55.000 | 5.434         | 3.770 | 0.002 | Yes    |
| -25.000 vs. -55.000 | 4.891         | 3.393 | 0.004 | Yes    |

## **Cardiac Output ( $Q_{MF}$ )**

Comparisons for factor: **Time of HDT within Prior HDT=-25**

| Comparison  | Diff of Means | t     | P     | P<0.05 |
|-------------|---------------|-------|-------|--------|
| BL vs. HDT1 | 0.290         | 3.187 | 0.008 | Yes    |

Comparisons for factor: **Time of HDT within Prior HDT=-55**

| Comparison  | Diff of Means | t     | P      | P<0.05 |
|-------------|---------------|-------|--------|--------|
| BL vs. HDT1 | 0.712         | 7.827 | <0.001 | Yes    |
| BL vs. HDT2 | 0.614         | 6.747 | <0.001 | Yes    |

Comparisons for factor: **Condition within Time=HDT1**

| Comparison          | Diff of Means | t     | P      | P<0.05 |
|---------------------|---------------|-------|--------|--------|
| -10.000 vs. -55.000 | 0.641         | 4.329 | <0.001 | Yes    |
| -25.000 vs. -55.000 | 0.434         | 2.932 | 0.014  | Yes    |

Comparisons for factor: **Condition within Time=HDT2**

| <b>Comparison</b>   | <b>Diff of Means</b> | <b>t</b> | <b>P</b> | <b>P&lt;0.05</b> |
|---------------------|----------------------|----------|----------|------------------|
| -10.000 vs. -55.000 | 0.687                | 4.640    | <0.001   | Yes              |
| -25.000 vs. -55.000 | 0.465                | 3.141    | 0.008    | Yes              |

### **Total Peripheral Resistance Index (TPRi)**

Comparisons for factor: **Time of HDT within Prior HDT=-25**

| <b>Comparison</b> | <b>Diff of Means</b> | <b>t</b> | <b>P</b> | <b>P&lt;0.05</b> |
|-------------------|----------------------|----------|----------|------------------|
| BL vs. HDT1       | 160.189              | 3.780    | 0.002    | Yes              |
| HDT1 vs. HDT2     | 120.057              | 2.833    | 0.015    | Yes              |

Comparisons for factor: **Time of HDT within Prior HDT=-55**

| <b>Comparison</b> | <b>Diff of Means</b> | <b>t</b> | <b>P</b> | <b>P&lt;0.05</b> |
|-------------------|----------------------|----------|----------|------------------|
| BL vs. HDT1       | 334.101              | 7.884    | <0.001   | Yes              |
| BL vs. HDT2       | 190.573              | 4.497    | <0.001   | Yes              |
| HDT1 vs. HDT2     | 143.527              | 3.387    | 0.002    | Yes              |

Comparisons for factor: **Condition within Time=HDT1**

| <b>Comparison</b>   | <b>Diff of Means</b> | <b>t</b> | <b>P</b> | <b>P&lt;0.05</b> |
|---------------------|----------------------|----------|----------|------------------|
| -55.000 vs. -10.000 | 190.923              | 4.097    | <0.001   | Yes              |
| -55.000 vs. -25.000 | 156.436              | 3.357    | 0.004    | Yes              |

Comparisons for factor: **Condition within Time=HDT2**

| <b>Comparison</b>   | <b>Diff of Means</b> | <b>t</b> | <b>P</b> | <b>P&lt;0.05</b> |
|---------------------|----------------------|----------|----------|------------------|
| -55.000 vs. -10.000 | 147.123              | 3.157    | 0.010    | Yes              |
| -55.000 vs. -25.000 | 132.966              | 2.853    | 0.015    | Yes              |

**Table A2 – Comparison during HUT:** Main effects and interactions from two-way repeated measures analysis of variance (ANOVA), statistical power and selected post-hoc comparisons for variables measured during the first minute of the head up tilt (HUT) position after prior supine rest (control, CON) or 15s of head down tilt (HDT) at three different angles (-10°, -25° and -55°). Only statistically significant comparisons are displayed for Time of HUT (5, 10, 15, 20, 40, 60s) within the Condition, or for Condition at any Time of HUT.

| P-values for main effects and interactions during HUT |        |                   |                  |           |        |        |        |        |                  |                                 |
|-------------------------------------------------------|--------|-------------------|------------------|-----------|--------|--------|--------|--------|------------------|---------------------------------|
|                                                       | MFV    | BP <sub>MCA</sub> | CV <sub>Ri</sub> | AutoregCI | HR     | MAP    | SV     | CO     | TP <sub>Ri</sub> | P <sub>ET</sub> CO <sub>2</sub> |
| Subject                                               | <0.001 |                   | <0.001           | 0.025     |        |        |        |        |                  |                                 |
| Condition                                             | 0.456  | <0.001            | <0.001           | 0.22      | 0.011  | <0.001 | <0.001 | <0.001 | <0.001           | 0.905                           |
| Condition * Subject                                   |        |                   |                  |           |        |        |        |        |                  |                                 |
| Time of HUT                                           | 0.002  | <0.001            | <0.001           | 0.003     | 0.01   | <0.001 | <0.001 | <0.001 | <0.001           | 0.418                           |
| Time of HUT * Subj                                    |        |                   |                  |           |        |        |        |        |                  |                                 |
| Condition * Time of HUT                               | <0.001 | <0.001            | <0.001           | <0.001    | <0.001 | <0.001 | <0.001 | <0.001 | <0.001           | 0.847                           |
|                                                       |        |                   |                  |           |        |        |        |        |                  |                                 |
| Power of performed test                               |        |                   |                  |           |        |        |        |        |                  |                                 |
| Condition                                             | 0.05   | 0.998             | 0.999            | 0.603     | 0.722  | 0.998  | 0.949  | 1      | 1                | 0.05                            |
| Time of HUT                                           | 0.898  | 1                 | 1                | 0.865     | 0.715  | 1      | 1      | 1      | 1                | 0.05                            |
| Condition * Time of HUT                               | 1      | 1                 | 1                | 0.999     | 0.992  | 1      | 1      | 1      | 1                | 0.05                            |

Abbreviations: MFV = middle cerebral artery mean flow velocity; BP<sub>MCA</sub> = blood pressure at the level of the middle cerebral artery; AutoregCI = autoregulation correction index; HR = heart rate; MAP = mean arterial pressure; SV = stroke volume; CO = cardiac output; TP<sub>Ri</sub> = total peripheral resistance index calculated as MAP / CO.

### **Cerebral Mean Flow Velocity (MFV)**

Comparisons for factor: **Time of HUT within Prior HDT=-25**

| Comparison       | Diff of Means | t     | P      | P<0.05 |
|------------------|---------------|-------|--------|--------|
| 15.000 vs. 5.000 | 8.920         | 4.618 | <0.001 | Yes    |
| 10.000 vs. 5.000 | 7.701         | 3.988 | 0.001  | Yes    |
| 40.000 vs. 5.000 | 5.911         | 3.060 | 0.034  | Yes    |

Comparisons for factor: **Time of HUT within Prior HDT=-55**

| Comparison       | Diff of Means | t     | P      | P<0.05 |
|------------------|---------------|-------|--------|--------|
| 15.000 vs. 5.000 | 14.300        | 7.404 | <0.001 | Yes    |
| 20.000 vs. 5.000 | 12.101        | 6.266 | <0.001 | Yes    |
| 40.000 vs. 5.000 | 11.328        | 5.865 | <0.001 | Yes    |
| 10.000 vs. 5.000 | 10.328        | 5.348 | <0.001 | Yes    |
| 60.000 vs. 5.000 | 9.176         | 4.751 | <0.001 | Yes    |

Comparisons for factor: **Condition within Time=5**

| Comparison | Diff of Means | t | P | P<0.05 |
|------------|---------------|---|---|--------|
|------------|---------------|---|---|--------|

|                     |        |       |        |     |
|---------------------|--------|-------|--------|-----|
| CON vs. -55.000     | 13.650 | 6.982 | <0.001 | Yes |
| CON vs. -25.000     | 9.369  | 4.792 | <0.001 | Yes |
| -10.000 vs. -55.000 | 7.656  | 3.752 | 0.001  | Yes |
| CON vs. -10.000     | 5.995  | 2.938 | 0.012  | Yes |

### **Blood Pressure at Middle Cerebral Artery (BP<sub>MCA</sub>)**

Comparisons for factor: **Time of HUT within CON**

| <b>Comparison</b> | <b>Diff of Means</b> | <b>t</b> | <b>P</b> | <b>P&lt;0.05</b> |
|-------------------|----------------------|----------|----------|------------------|
| 20.000 vs. 5.000  | 6.765                | 3.436    | 0.013    | Yes              |

Comparisons for factor: **Time of HUT within Prior HDT=-10**

| <b>Comparison</b> | <b>Diff of Means</b> | <b>t</b> | <b>P</b> | <b>P&lt;0.05</b> |
|-------------------|----------------------|----------|----------|------------------|
| 40.000 vs. 5.000  | 13.856               | 7.037    | <0.001   | Yes              |
| 60.000 vs. 5.000  | 12.838               | 6.520    | <0.001   | Yes              |
| 20.000 vs. 5.000  | 12.191               | 6.192    | <0.001   | Yes              |
| 40.000 vs. 10.000 | 11.305               | 5.742    | <0.001   | Yes              |
| 15.000 vs. 5.000  | 10.395               | 5.280    | <0.001   | Yes              |
| 60.000 vs. 10.000 | 10.288               | 5.225    | <0.001   | Yes              |
| 20.000 vs. 10.000 | 9.640                | 4.896    | <0.001   | Yes              |
| 15.000 vs. 10.000 | 7.845                | 3.984    | 0.001    | Yes              |

Comparisons for factor: **Time of HUT within Prior HDT=-25**

| <b>Comparison</b> | <b>Diff of Means</b> | <b>t</b> | <b>P</b> | <b>P&lt;0.05</b> |
|-------------------|----------------------|----------|----------|------------------|
| 20.000 vs. 5.000  | 19.617               | 9.963    | <0.001   | Yes              |
| 40.000 vs. 5.000  | 19.566               | 9.937    | <0.001   | Yes              |
| 60.000 vs. 5.000  | 17.598               | 8.938    | <0.001   | Yes              |
| 15.000 vs. 5.000  | 15.074               | 7.656    | <0.001   | Yes              |
| 20.000 vs. 10.000 | 13.430               | 6.821    | <0.001   | Yes              |
| 40.000 vs. 10.000 | 13.379               | 6.795    | <0.001   | Yes              |
| 60.000 vs. 10.000 | 11.411               | 5.795    | <0.001   | Yes              |
| 15.000 vs. 10.000 | 8.887                | 4.514    | <0.001   | Yes              |
| 10.000 vs. 5.000  | 6.187                | 3.142    | 0.015    | Yes              |

Comparisons for factor: **Time of HUT within Prior HDT=-55**

| <b>Comparison</b> | <b>Diff of Means</b> | <b>t</b> | <b>P</b> | <b>P&lt;0.05</b> |
|-------------------|----------------------|----------|----------|------------------|
| 40.000 vs. 5.000  | 28.299               | 14.372   | <0.001   | Yes              |
| 20.000 vs. 5.000  | 26.808               | 13.615   | <0.001   | Yes              |
| 60.000 vs. 5.000  | 26.542               | 13.480   | <0.001   | Yes              |
| 15.000 vs. 5.000  | 21.597               | 10.969   | <0.001   | Yes              |
| 40.000 vs. 10.000 | 20.176               | 10.247   | <0.001   | Yes              |
| 20.000 vs. 10.000 | 18.686               | 9.490    | <0.001   | Yes              |
| 60.000 vs. 10.000 | 18.419               | 9.355    | <0.001   | Yes              |
| 15.000 vs. 10.000 | 13.474               | 6.843    | <0.001   | Yes              |

|                   |       |       |        |     |
|-------------------|-------|-------|--------|-----|
| 10.000 vs. 5.000  | 8.123 | 4.125 | <0.001 | Yes |
| 40.000 vs. 15.000 | 6.702 | 3.404 | 0.006  | Yes |
| 20.000 vs. 15.000 | 5.212 | 2.647 | 0.046  | Yes |

Comparisons for factor: **Condition within Time=5**

| <b>Comparison</b>   | <b>Diff of Means</b> | <b>t</b> | <b>P</b> | <b>P&lt;0.05</b> |
|---------------------|----------------------|----------|----------|------------------|
| CON vs. -55.000     | 23.094               | 12.363   | <0.001   | Yes              |
| -10.000 vs. -55.000 | 15.635               | 8.370    | <0.001   | Yes              |
| CON vs. -25.000     | 13.455               | 7.203    | <0.001   | Yes              |
| -25.000 vs. -55.000 | 9.638                | 5.160    | <0.001   | Yes              |
| CON vs. -10.000     | 7.459                | 3.993    | <0.001   | Yes              |
| -10.000 vs. -25.000 | 5.996                | 3.210    | 0.002    | Yes              |

Comparisons for factor: **Condition within Time=10**

| <b>Comparison</b>   | <b>Diff of Means</b> | <b>t</b> | <b>P</b> | <b>P&lt;0.05</b> |
|---------------------|----------------------|----------|----------|------------------|
| CON vs. -55.000     | 16.063               | 8.599    | <0.001   | Yes              |
| -10.000 vs. -55.000 | 10.063               | 5.387    | <0.001   | Yes              |
| CON vs. -25.000     | 8.360                | 4.476    | <0.001   | Yes              |
| -25.000 vs. -55.000 | 7.703                | 4.124    | <0.001   | Yes              |
| CON vs. -10.000     | 6.000                | 3.212    | 0.004    | Yes              |

Comparisons for factor: **Condition within Time=15**

| <b>Comparison</b> | <b>Diff of Means</b> | <b>t</b> | <b>P</b> | <b>P&lt;0.05</b> |
|-------------------|----------------------|----------|----------|------------------|
| CON vs. -55.000   | 5.650                | 3.025    | 0.020    | Yes              |

## **Cerebrovascular Resistance Index (CVRI)**

Comparisons for factor: **Time of HUT within CON**

| <b>Comparison</b> | <b>Diff of Means</b> | <b>t</b> | <b>P</b> | <b>P&lt;0.05</b> |
|-------------------|----------------------|----------|----------|------------------|
| 20.000 vs. 5.000  | 0.205                | 6.725    | <0.001   | Yes              |
| 20.000 vs. 10.000 | 0.171                | 5.614    | <0.001   | Yes              |
| 40.000 vs. 5.000  | 0.161                | 5.289    | <0.001   | Yes              |
| 15.000 vs. 5.000  | 0.145                | 4.745    | <0.001   | Yes              |
| 60.000 vs. 5.000  | 0.139                | 4.566    | <0.001   | Yes              |
| 40.000 vs. 10.000 | 0.128                | 4.177    | <0.001   | Yes              |
| 15.000 vs. 10.000 | 0.111                | 3.634    | 0.004    | Yes              |
| 60.000 vs. 10.000 | 0.105                | 3.455    | 0.006    | Yes              |

Comparisons for factor: **Time of HUT within -10**

| <b>Comparison</b> | <b>Diff of Means</b> | <b>t</b> | <b>P</b> | <b>P&lt;0.05</b> |
|-------------------|----------------------|----------|----------|------------------|
| 40.000 vs. 10.000 | 0.258                | 8.463    | <0.001   | Yes              |
| 40.000 vs. 5.000  | 0.266                | 8.362    | <0.001   | Yes              |
| 20.000 vs. 10.000 | 0.246                | 8.046    | <0.001   | Yes              |
| 20.000 vs. 5.000  | 0.254                | 7.963    | <0.001   | Yes              |



|                   |        |       |        |     |
|-------------------|--------|-------|--------|-----|
| 60.000 vs. 10.000 | 0.216  | 7.066 | <0.001 | Yes |
| 60.000 vs. 5.000  | 0.224  | 7.024 | <0.001 | Yes |
| 15.000 vs. 5.000  | 0.142  | 4.455 | <0.001 | Yes |
| 15.000 vs. 10.000 | 0.134  | 4.385 | <0.001 | Yes |
| 40.000 vs. 15.000 | 0.124  | 4.078 | <0.001 | Yes |
| 20.000 vs. 15.000 | 0.112  | 3.661 | 0.002  | Yes |
| 60.000 vs. 15.000 | 0.0818 | 2.681 | 0.042  | Yes |

Comparisons for factor: **Time of HUT within -25**

| <b>Comparison</b> | <b>Diff of Means</b> | <b>t</b> | <b>P</b> | <b>P&lt;0.05</b> |
|-------------------|----------------------|----------|----------|------------------|
| 20.000 vs. 5.000  | 0.301                | 9.859    | <0.001   | Yes              |
| 20.000 vs. 10.000 | 0.300                | 9.837    | <0.001   | Yes              |
| 60.000 vs. 5.000  | 0.289                | 9.479    | <0.001   | Yes              |
| 60.000 vs. 10.000 | 0.289                | 9.457    | <0.001   | Yes              |
| 40.000 vs. 5.000  | 0.287                | 9.398    | <0.001   | Yes              |
| 40.000 vs. 10.000 | 0.286                | 9.376    | <0.001   | Yes              |
| 15.000 vs. 5.000  | 0.159                | 5.219    | <0.001   | Yes              |
| 15.000 vs. 10.000 | 0.159                | 5.197    | <0.001   | Yes              |
| 20.000 vs. 15.000 | 0.142                | 4.640    | <0.001   | Yes              |
| 60.000 vs. 15.000 | 0.130                | 4.260    | <0.001   | Yes              |
| 40.000 vs. 15.000 | 0.128                | 4.179    | <0.001   | Yes              |

Comparisons for factor: **Time of HUT within -55**

| <b>Comparison</b> | <b>Diff of Means</b> | <b>t</b> | <b>P</b> | <b>P&lt;0.05</b> |
|-------------------|----------------------|----------|----------|------------------|
| 40.000 vs. 5.000  | 0.403                | 13.191   | <0.001   | Yes              |
| 60.000 vs. 5.000  | 0.395                | 12.926   | <0.001   | Yes              |
| 40.000 vs. 10.000 | 0.376                | 12.321   | <0.001   | Yes              |
| 60.000 vs. 10.000 | 0.368                | 12.056   | <0.001   | Yes              |
| 20.000 vs. 5.000  | 0.359                | 11.764   | <0.001   | Yes              |
| 20.000 vs. 10.000 | 0.333                | 10.893   | <0.001   | Yes              |
| 15.000 vs. 5.000  | 0.243                | 7.947    | <0.001   | Yes              |
| 15.000 vs. 10.000 | 0.216                | 7.077    | <0.001   | Yes              |
| 40.000 vs. 15.000 | 0.160                | 5.244    | <0.001   | Yes              |
| 60.000 vs. 15.000 | 0.152                | 4.979    | <0.001   | Yes              |
| 20.000 vs. 15.000 | 0.117                | 3.816    | 0.001    | Yes              |

Comparisons for factor: **Condition within Time=5**

| <b>Comparison</b>   | <b>Diff of Means</b> | <b>t</b> | <b>P</b> | <b>P&lt;0.05</b> |
|---------------------|----------------------|----------|----------|------------------|
| CON vs. -55.000     | 0.263                | 8.125    | <0.001   | Yes              |
| -10.000 vs. -55.000 | 0.221                | 6.532    | <0.001   | Yes              |
| -25.000 vs. -55.000 | 0.142                | 4.394    | <0.001   | Yes              |
| CON vs. -25.000     | 0.121                | 3.732    | 0.001    | Yes              |

|                     |        |       |       |     |
|---------------------|--------|-------|-------|-----|
| -10.000 vs. -25.000 | 0.0784 | 2.321 | 0.046 | Yes |
|---------------------|--------|-------|-------|-----|

Comparisons for factor: **Condition within Time=10**

| <b>Comparison</b>   | <b>Diff of Means</b> | <b>t</b> | <b>P</b> | <b>P&lt;0.05</b> |
|---------------------|----------------------|----------|----------|------------------|
| CON vs. -55.000     | 0.270                | 8.353    | <0.001   | Yes              |
| -10.000 vs. -55.000 | 0.202                | 6.243    | <0.001   | Yes              |
| CON vs. -25.000     | 0.154                | 4.759    | <0.001   | Yes              |
| -25.000 vs. -55.000 | 0.116                | 3.593    | 0.002    | Yes              |
| -10.000 vs. -25.000 | 0.0858               | 2.650    | 0.020    | Yes              |
| CON vs. -10.000     | 0.0683               | 2.109    | 0.039    | Yes              |

Comparisons for factor: **Condition within Time=15**

| <b>Comparison</b>   | <b>Diff of Means</b> | <b>t</b> | <b>P</b> | <b>P&lt;0.05</b> |
|---------------------|----------------------|----------|----------|------------------|
| CON vs. -55.000     | 0.165                | 5.105    | <0.001   | Yes              |
| -10.000 vs. -55.000 | 0.120                | 3.704    | 0.002    | Yes              |
| CON vs. -25.000     | 0.106                | 3.284    | 0.007    | Yes              |

Comparisons for factor: **Condition within Time=20**

| <b>Comparison</b>   | <b>Diff of Means</b> | <b>t</b> | <b>P</b> | <b>P&lt;0.05</b> |
|---------------------|----------------------|----------|----------|------------------|
| -10.000 vs. -55.000 | 0.115                | 3.558    | 0.004    | Yes              |
| CON vs. -55.000     | 0.109                | 3.373    | 0.006    | Yes              |
| -25.000 vs. -55.000 | 0.0841               | 2.597    | 0.046    | Yes              |

## **Autoregulation Correction Index (AutoregCI)**

Comparisons for factor: **Time of HUT within CON**

| <b>Comparison</b> | <b>Diff of Means</b> | <b>t</b> | <b>P</b> | <b>P&lt;0.05</b> |
|-------------------|----------------------|----------|----------|------------------|
| 5.000 vs. 20.000  | 0.259                | 3.316    | 0.018    | Yes              |

Comparisons for factor: **Time of HUT within Prior HDT=-10**

| <b>Comparison</b> | <b>Diff of Means</b> | <b>t</b> | <b>P</b> | <b>P&lt;0.05</b> |
|-------------------|----------------------|----------|----------|------------------|
| 15.000 vs. 20.000 | 0.276                | 3.048    | 0.042    | Yes              |

Comparisons for factor: **Time of HUT within Prior HDT=-25**

| <b>Comparison</b> | <b>Diff of Means</b> | <b>t</b> | <b>P</b> | <b>P&lt;0.05</b> |
|-------------------|----------------------|----------|----------|------------------|
| 10.000 vs. 60.000 | 0.313                | 4.012    | 0.002    | Yes              |
| 15.000 vs. 60.000 | 0.265                | 3.403    | 0.013    | Yes              |
| 10.000 vs. 5.000  | 0.257                | 3.293    | 0.017    | Yes              |

Comparisons for factor: **Time of HUT within Prior HDT=-55**

| <b>Comparison</b> | <b>Diff of Means</b> | <b>t</b> | <b>P</b> | <b>P&lt;0.05</b> |
|-------------------|----------------------|----------|----------|------------------|
|-------------------|----------------------|----------|----------|------------------|

|                   |       |       |        |     |
|-------------------|-------|-------|--------|-----|
| 15.000 vs. 5.000  | 0.326 | 4.177 | <0.001 | Yes |
| 10.000 vs. 5.000  | 0.300 | 3.848 | 0.003  | Yes |
| 15.000 vs. 60.000 | 0.264 | 3.384 | 0.012  | Yes |
| 10.000 vs. 60.000 | 0.238 | 3.055 | 0.033  | Yes |

Comparisons for factor: **Condition within Time = 5**

| <b>Comparison</b> | <b>Diff of Means</b> | <b>t</b> | <b>P</b> | <b>P&lt;0.05</b> |
|-------------------|----------------------|----------|----------|------------------|
| CON vs. -10.000   | 0.300                | 3.355    | 0.008    | Yes              |
| CON vs. -55.000   | 0.259                | 3.023    | 0.017    | Yes              |
| CON vs. -25.000   | 0.254                | 2.971    | 0.016    | Yes              |

Comparisons for factor: **Condition within Time = 10**

| <b>Comparison</b>   | <b>Diff of Means</b> | <b>t</b> | <b>P</b> | <b>P&lt;0.05</b> |
|---------------------|----------------------|----------|----------|------------------|
| -55.000 vs. -10.000 | 0.273                | 3.186    | 0.013    | Yes              |
| -25.000 vs. -10.000 | 0.234                | 2.734    | 0.039    | Yes              |

Comparisons for factor: **Condition within Time = 15**

| <b>Comparison</b> | <b>Diff of Means</b> | <b>t</b> | <b>P</b> | <b>P&lt;0.05</b> |
|-------------------|----------------------|----------|----------|------------------|
| -55.000 vs. CON   | 0.279                | 3.255    | 0.010    | Yes              |

Comparisons for factor: **Condition within Time=20**

| <b>Comparison</b>   | <b>Diff of Means</b> | <b>t</b> | <b>P</b> | <b>P&lt;0.05</b> |
|---------------------|----------------------|----------|----------|------------------|
| -55.000 vs. -10.000 | 0.382                | 4.008    | <0.001   | Yes              |
| -25.000 vs. -10.000 | 0.276                | 2.787    | 0.034    | Yes              |

Comparisons for factor: **Condition within Time = 40**

| <b>Comparison</b>   | <b>Diff of Means</b> | <b>t</b> | <b>P</b> | <b>P&lt;0.05</b> |
|---------------------|----------------------|----------|----------|------------------|
| -55.000 vs. -10.000 | 0.297                | 3.129    | 0.015    | Yes              |

## **Heart Rate (HR)**

Comparisons for factor: **Time of HUT within Prior HDT=-25**

| <b>Comparison</b> | <b>Diff of Means</b> | <b>t</b> | <b>P</b> | <b>P&lt;0.05</b> |
|-------------------|----------------------|----------|----------|------------------|
| 10.000 vs. 20.000 | 6.638                | 3.644    | 0.006    | Yes              |
| 60.000 vs. 20.000 | 5.739                | 3.150    | 0.029    | Yes              |

Comparisons for factor: **Time of HUT within Prior HDT=-55**

| <b>Comparison</b> | <b>Diff of Means</b> | <b>t</b> | <b>P</b> | <b>P&lt;0.05</b> |
|-------------------|----------------------|----------|----------|------------------|
| 10.000 vs. 20.000 | 9.569                | 5.253    | <0.001   | Yes              |
| 10.000 vs. 40.000 | 8.748                | 4.802    | <0.001   | Yes              |
| 10.000 vs. 60.000 | 6.706                | 3.681    | 0.005    | Yes              |

|                  |       |       |       |     |
|------------------|-------|-------|-------|-----|
| 5.000 vs. 20.000 | 5.521 | 3.031 | 0.036 | Yes |
|------------------|-------|-------|-------|-----|

Comparisons for factor: **Condition within Time=5**

| <b>Comparison</b>   | <b>Diff of Means</b> | <b>t</b> | <b>P</b> | <b>P&lt;0.05</b> |
|---------------------|----------------------|----------|----------|------------------|
| -55.000 vs. -10.000 | 7.394                | 3.755    | 0.002    | Yes              |
| -55.000 vs. CON     | 7.113                | 3.612    | 0.003    | Yes              |
| -55.000 vs. -25.000 | 5.169                | 2.625    | 0.042    | Yes              |

Comparisons for factor: **Condition within Time=10**

| <b>Comparison</b>   | <b>Diff of Means</b> | <b>t</b> | <b>P</b> | <b>P&lt;0.05</b> |
|---------------------|----------------------|----------|----------|------------------|
| -55.000 vs. CON     | 10.646               | 5.406    | <0.001   | Yes              |
| -55.000 vs. -10.000 | 8.595                | 4.364    | <0.001   | Yes              |
| -55.000 vs. -25.000 | 6.748                | 3.427    | 0.004    | Yes              |

Comparisons for factor: **Condition within Time=15**

| <b>Comparison</b>   | <b>Diff of Means</b> | <b>t</b> | <b>P</b> | <b>P&lt;0.05</b> |
|---------------------|----------------------|----------|----------|------------------|
| -55.000 vs. CON     | 7.800                | 3.961    | 0.001    | Yes              |
| -55.000 vs. -10.000 | 6.209                | 3.153    | 0.012    | Yes              |
| -55.000 vs. -25.000 | 5.177                | 2.629    | 0.042    | Yes              |

## **Mean Arterial Pressure (MAP)**

Comparisons for factor: **Time of HUT within CON**

| <b>Comparison</b> | <b>Diff of Means</b> | <b>t</b> | <b>P</b> | <b>P&lt;0.05</b> |
|-------------------|----------------------|----------|----------|------------------|
| 20.000 vs. 5.000  | 6.926                | 3.546    | 0.009    | Yes              |

Comparisons for factor: **Time of HUT within Prior HDT=-10**

| <b>Comparison</b> | <b>Diff of Means</b> | <b>t</b> | <b>P</b> | <b>P&lt;0.05</b> |
|-------------------|----------------------|----------|----------|------------------|
| 40.000 vs. 5.000  | 13.801               | 7.066    | <0.001   | Yes              |
| 60.000 vs. 5.000  | 13.034               | 6.673    | <0.001   | Yes              |
| 20.000 vs. 5.000  | 12.308               | 6.301    | <0.001   | Yes              |
| 40.000 vs. 10.000 | 11.190               | 5.729    | <0.001   | Yes              |
| 15.000 vs. 5.000  | 10.430               | 5.340    | <0.001   | Yes              |
| 60.000 vs. 10.000 | 10.423               | 5.336    | <0.001   | Yes              |
| 20.000 vs. 10.000 | 9.697                | 4.964    | <0.001   | Yes              |
| 15.000 vs. 10.000 | 7.819                | 4.003    | <0.001   | Yes              |

Comparisons for factor: **Time of HUT within Prior HDT=-25**

| <b>Comparison</b> | <b>Diff of Means</b> | <b>t</b> | <b>P</b> | <b>P&lt;0.05</b> |
|-------------------|----------------------|----------|----------|------------------|
| 20.000 vs. 5.000  | 19.826               | 10.150   | <0.001   | Yes              |
| 40.000 vs. 5.000  | 19.502               | 9.985    | <0.001   | Yes              |
| 60.000 vs. 5.000  | 17.817               | 9.122    | <0.001   | Yes              |

|                   |        |       |        |     |
|-------------------|--------|-------|--------|-----|
| 15.000 vs. 5.000  | 15.281 | 7.824 | <0.001 | Yes |
| 20.000 vs. 10.000 | 13.485 | 6.904 | <0.001 | Yes |
| 40.000 vs. 10.000 | 13.161 | 6.738 | <0.001 | Yes |
| 60.000 vs. 10.000 | 11.476 | 5.876 | <0.001 | Yes |
| 15.000 vs. 10.000 | 8.940  | 4.577 | <0.001 | Yes |
| 10.000 vs. 5.000  | 6.341  | 3.246 | 0.011  | Yes |

Comparisons for factor: **Time of HUT within Prior HDT=-55**

| <b>Comparison</b> | <b>Diff of Means</b> | <b>t</b> | <b>P</b> | <b>P&lt;0.05</b> |
|-------------------|----------------------|----------|----------|------------------|
| 40.000 vs. 5.000  | 28.652               | 14.669   | <0.001   | Yes              |
| 20.000 vs. 5.000  | 27.352               | 14.003   | <0.001   | Yes              |
| 60.000 vs. 5.000  | 27.223               | 13.937   | <0.001   | Yes              |
| 15.000 vs. 5.000  | 22.101               | 11.315   | <0.001   | Yes              |
| 40.000 vs. 10.000 | 20.168               | 10.326   | <0.001   | Yes              |
| 20.000 vs. 10.000 | 18.868               | 9.660    | <0.001   | Yes              |
| 60.000 vs. 10.000 | 18.740               | 9.594    | <0.001   | Yes              |
| 15.000 vs. 10.000 | 13.618               | 6.972    | <0.001   | Yes              |
| 10.000 vs. 5.000  | 8.484                | 4.343    | <0.001   | Yes              |
| 40.000 vs. 15.000 | 6.551                | 3.354    | 0.007    | Yes              |
| 20.000 vs. 15.000 | 5.251                | 2.688    | 0.041    | Yes              |
| 60.000 vs. 15.000 | 5.122                | 2.622    | 0.040    | Yes              |

Comparisons for factor: **Condition within Time=5**

| <b>Comparison</b>   | <b>Diff of Means</b> | <b>t</b> | <b>P</b> | <b>P&lt;0.05</b> |
|---------------------|----------------------|----------|----------|------------------|
| CON vs. -55.000     | 23.939               | 12.304   | <0.001   | Yes              |
| -10.000 vs. -55.000 | 16.253               | 8.353    | <0.001   | Yes              |
| CON vs. -25.000     | 13.861               | 7.124    | <0.001   | Yes              |
| -25.000 vs. -55.000 | 10.079               | 5.180    | <0.001   | Yes              |
| CON vs. -10.000     | 7.687                | 3.951    | <0.001   | Yes              |
| -10.000 vs. -25.000 | 6.174                | 3.173    | 0.002    | Yes              |

Comparisons for factor: **Condition within Time=10**

| <b>Comparison</b>   | <b>Diff of Means</b> | <b>t</b> | <b>P</b> | <b>P&lt;0.05</b> |
|---------------------|----------------------|----------|----------|------------------|
| CON vs. -55.000     | 16.703               | 8.585    | <0.001   | Yes              |
| -10.000 vs. -55.000 | 10.380               | 5.335    | <0.001   | Yes              |
| CON vs. -25.000     | 8.767                | 4.506    | <0.001   | Yes              |
| -25.000 vs. -55.000 | 7.936                | 4.079    | <0.001   | Yes              |
| CON vs. -10.000     | 6.323                | 3.250    | 0.004    | Yes              |

Comparisons for factor: **Condition within Time=15**

| <b>Comparison</b> | <b>Diff of Means</b> | <b>t</b> | <b>P</b> | <b>P&lt;0.05</b> |
|-------------------|----------------------|----------|----------|------------------|
| CON vs. -55.000   | 6.193                | 3.183    | 0.013    | Yes              |

## **Stroke Volume (SV)**

Comparisons for factor: **Time of HUT within CON**

| <b>Comparison</b> | <b>Diff of Means</b> | <b>t</b> | <b>P</b> | <b>P&lt;0.05</b> |
|-------------------|----------------------|----------|----------|------------------|
| 5.000 vs. 60.000  | 13.523               | 5.955    | <0.001   | Yes              |
| 5.000 vs. 40.000  | 11.477               | 5.054    | <0.001   | Yes              |
| 5.000 vs. 20.000  | 10.192               | 4.488    | <0.001   | Yes              |
| 5.000 vs. 10.000  | 6.952                | 3.061    | 0.033    | Yes              |
| 5.000 vs. 15.000  | 6.804                | 2.996    | 0.037    | Yes              |
| 15.000 vs. 60.000 | 6.718                | 2.958    | 0.037    | Yes              |
| 10.000 vs. 60.000 | 6.571                | 2.894    | 0.041    | Yes              |

Comparisons for factor: **Time of HUT within Prior HDT=-10**

| <b>Comparison</b> | <b>Diff of Means</b> | <b>t</b> | <b>P</b> | <b>P&lt;0.05</b> |
|-------------------|----------------------|----------|----------|------------------|
| 5.000 vs. 60.000  | 24.117               | 10.620   | <0.001   | Yes              |
| 5.000 vs. 40.000  | 20.249               | 8.917    | <0.001   | Yes              |
| 10.000 vs. 60.000 | 17.292               | 7.614    | <0.001   | Yes              |
| 5.000 vs. 20.000  | 14.850               | 6.539    | <0.001   | Yes              |
| 10.000 vs. 40.000 | 13.424               | 5.911    | <0.001   | Yes              |
| 5.000 vs. 15.000  | 12.370               | 5.447    | <0.001   | Yes              |
| 15.000 vs. 60.000 | 11.747               | 5.173    | <0.001   | Yes              |
| 20.000 vs. 60.000 | 9.267                | 4.081    | <0.001   | Yes              |
| 10.000 vs. 20.000 | 8.024                | 3.534    | 0.004    | Yes              |
| 15.000 vs. 40.000 | 7.879                | 3.470    | 0.004    | Yes              |
| 5.000 vs. 10.000  | 6.825                | 3.006    | 0.016    | Yes              |

Comparisons for factor: **Time of HUT within Prior HDT=-25**

| <b>Comparison</b> | <b>Diff of Means</b> | <b>t</b> | <b>P</b> | <b>P&lt;0.05</b> |
|-------------------|----------------------|----------|----------|------------------|
| 5.000 vs. 60.000  | 24.565               | 10.817   | <0.001   | Yes              |
| 5.000 vs. 40.000  | 20.386               | 8.977    | <0.001   | Yes              |
| 10.000 vs. 60.000 | 19.331               | 8.512    | <0.001   | Yes              |
| 5.000 vs. 20.000  | 15.214               | 6.699    | <0.001   | Yes              |
| 10.000 vs. 40.000 | 15.152               | 6.672    | <0.001   | Yes              |
| 15.000 vs. 60.000 | 12.456               | 5.485    | <0.001   | Yes              |
| 5.000 vs. 15.000  | 12.109               | 5.332    | <0.001   | Yes              |
| 10.000 vs. 20.000 | 9.979                | 4.394    | <0.001   | Yes              |
| 20.000 vs. 60.000 | 9.351                | 4.118    | <0.001   | Yes              |
| 15.000 vs. 40.000 | 8.278                | 3.645    | 0.002    | Yes              |
| 10.000 vs. 15.000 | 6.874                | 3.027    | 0.015    | Yes              |

Comparisons for factor: **Time of HUT within Prior HDT=-55**

| <b>Comparison</b> | <b>Diff of Means</b> | <b>t</b> | <b>P</b> | <b>P&lt;0.05</b> |
|-------------------|----------------------|----------|----------|------------------|
| 5.000 vs. 60.000  | 24.372               | 10.732   | <0.001   | Yes              |
| 10.000 vs. 60.000 | 22.698               | 9.995    | <0.001   | Yes              |

|                   |        |       |        |     |
|-------------------|--------|-------|--------|-----|
| 5.000 vs. 40.000  | 20.056 | 8.832 | <0.001 | Yes |
| 10.000 vs. 40.000 | 18.383 | 8.095 | <0.001 | Yes |
| 15.000 vs. 60.000 | 14.595 | 6.427 | <0.001 | Yes |
| 5.000 vs. 20.000  | 14.479 | 6.376 | <0.001 | Yes |
| 10.000 vs. 20.000 | 12.806 | 5.639 | <0.001 | Yes |
| 15.000 vs. 40.000 | 10.280 | 4.527 | <0.001 | Yes |
| 20.000 vs. 60.000 | 9.893  | 4.356 | <0.001 | Yes |
| 5.000 vs. 15.000  | 9.776  | 4.305 | <0.001 | Yes |
| 10.000 vs. 15.000 | 8.103  | 3.568 | 0.003  | Yes |

Comparisons for factor: **Condition within Time=5**

| <b>Comparison</b> | <b>Diff of Means</b> | <b>t</b> | <b>P</b> | <b>P&lt;0.05</b> |
|-------------------|----------------------|----------|----------|------------------|
| -25.000 vs. CON   | 11.771               | 5.264    | <0.001   | Yes              |
| -55.000 vs. CON   | 9.826                | 4.394    | <0.001   | Yes              |
| -10.000 vs. CON   | 9.260                | 4.141    | <0.001   | Yes              |

Comparisons for factor: **Condition within Time=10**

| <b>Comparison</b>   | <b>Diff of Means</b> | <b>t</b> | <b>P</b> | <b>P&lt;0.05</b> |
|---------------------|----------------------|----------|----------|------------------|
| -55.000 vs. CON     | 15.104               | 6.755    | <0.001   | Yes              |
| -25.000 vs. CON     | 13.489               | 6.032    | <0.001   | Yes              |
| -10.000 vs. CON     | 9.386                | 4.197    | <0.001   | Yes              |
| -55.000 vs. -10.000 | 5.718                | 2.557    | 0.037    | Yes              |

Comparisons for factor: **Condition within Time=15**

| <b>Comparison</b> | <b>Diff of Means</b> | <b>t</b> | <b>P</b> | <b>P&lt;0.05</b> |
|-------------------|----------------------|----------|----------|------------------|
| -55.000 vs. CON   | 6.854                | 3.065    | 0.018    | Yes              |
| -25.000 vs. CON   | 6.467                | 2.892    | 0.024    | Yes              |

Comparisons for factor: **Condition within Time=20**

| <b>Comparison</b> | <b>Diff of Means</b> | <b>t</b> | <b>P</b> | <b>P&lt;0.05</b> |
|-------------------|----------------------|----------|----------|------------------|
| -25.000 vs. CON   | 6.750                | 3.018    | 0.020    | Yes              |

## **Cardiac Output ( $Q_{MF}$ )**

Comparisons for factor: **Time of HUT within CON**

| <b>Comparison</b> | <b>Diff of Means</b> | <b>t</b> | <b>P</b> | <b>P&lt;0.05</b> |
|-------------------|----------------------|----------|----------|------------------|
| 5.000 vs. 60.000  | 0.742                | 4.479    | <0.001   | Yes              |
| 5.000 vs. 40.000  | 0.693                | 4.184    | <0.001   | Yes              |
| 5.000 vs. 20.000  | 0.661                | 3.990    | 0.001    | Yes              |

Comparisons for factor: **Time of HUT within Prior HDT=-10**

| <b>Comparison</b> | <b>Diff of Means</b> | <b>t</b> | <b>P</b> | <b>P&lt;0.05</b> |
|-------------------|----------------------|----------|----------|------------------|
| 5.000 vs. 60.000  | 1.489                | 8.989    | <0.001   | Yes              |
| 5.000 vs. 40.000  | 1.366                | 8.245    | <0.001   | Yes              |

|                   |       |       |        |     |
|-------------------|-------|-------|--------|-----|
| 10.000 vs. 60.000 | 1.130 | 6.820 | <0.001 | Yes |
| 5.000 vs. 20.000  | 1.076 | 6.494 | <0.001 | Yes |
| 10.000 vs. 40.000 | 1.007 | 6.076 | <0.001 | Yes |
| 5.000 vs. 15.000  | 0.856 | 5.168 | <0.001 | Yes |
| 10.000 vs. 20.000 | 0.717 | 4.325 | <0.001 | Yes |
| 15.000 vs. 60.000 | 0.633 | 3.821 | 0.002  | Yes |
| 15.000 vs. 40.000 | 0.510 | 3.077 | 0.018  | Yes |
| 10.000 vs. 15.000 | 0.497 | 2.999 | 0.020  | Yes |

Comparisons for factor: **Time of HUT within Prior HDT=-25**

| <b>Comparison</b> | <b>Diff of Means</b> | <b>t</b> | <b>P</b> | <b>P&lt;0.05</b> |
|-------------------|----------------------|----------|----------|------------------|
| 5.000 vs. 60.000  | 1.737                | 10.483   | <0.001   | Yes              |
| 5.000 vs. 40.000  | 1.635                | 9.872    | <0.001   | Yes              |
| 10.000 vs. 60.000 | 1.514                | 9.139    | <0.001   | Yes              |
| 10.000 vs. 40.000 | 1.413                | 8.528    | <0.001   | Yes              |
| 5.000 vs. 20.000  | 1.398                | 8.438    | <0.001   | Yes              |
| 10.000 vs. 20.000 | 1.175                | 7.094    | <0.001   | Yes              |
| 5.000 vs. 15.000  | 0.938                | 5.659    | <0.001   | Yes              |
| 15.000 vs. 60.000 | 0.799                | 4.823    | <0.001   | Yes              |
| 10.000 vs. 15.000 | 0.715                | 4.316    | <0.001   | Yes              |
| 15.000 vs. 40.000 | 0.698                | 4.212    | <0.001   | Yes              |
| 15.000 vs. 20.000 | 0.460                | 2.778    | 0.031    | Yes              |

Comparisons for factor: **Time of HUT within Prior HDT=-55**

| <b>Comparison</b> | <b>Diff of Means</b> | <b>t</b> | <b>P</b> | <b>P&lt;0.05</b> |
|-------------------|----------------------|----------|----------|------------------|
| 10.000 vs. 60.000 | 2.109                | 12.727   | <0.001   | Yes              |
| 5.000 vs. 60.000  | 2.024                | 12.216   | <0.001   | Yes              |
| 10.000 vs. 40.000 | 1.920                | 11.589   | <0.001   | Yes              |
| 5.000 vs. 40.000  | 1.835                | 11.077   | <0.001   | Yes              |
| 10.000 vs. 20.000 | 1.559                | 9.408    | <0.001   | Yes              |
| 5.000 vs. 20.000  | 1.474                | 8.897    | <0.001   | Yes              |
| 15.000 vs. 60.000 | 1.208                | 7.290    | <0.001   | Yes              |
| 15.000 vs. 40.000 | 1.019                | 6.151    | <0.001   | Yes              |
| 10.000 vs. 15.000 | 0.901                | 5.438    | <0.001   | Yes              |
| 5.000 vs. 15.000  | 0.816                | 4.926    | <0.001   | Yes              |
| 15.000 vs. 20.000 | 0.658                | 3.970    | <0.001   | Yes              |
| 20.000 vs. 60.000 | 0.550                | 3.319    | 0.005    | Yes              |

Comparisons for factor: **Condition within Time=5**

| <b>Comparison</b> | <b>Diff of Means</b> | <b>t</b> | <b>P</b> | <b>P&lt;0.05</b> |
|-------------------|----------------------|----------|----------|------------------|
| -55.000 vs. CON   | 1.315                | 8.277    | <0.001   | Yes              |
| -25.000 vs. CON   | 1.064                | 6.695    | <0.001   | Yes              |
| -10.000 vs. CON   | 0.714                | 4.494    | <0.001   | Yes              |



|                     |       |       |        |     |
|---------------------|-------|-------|--------|-----|
| -55.000 vs. -10.000 | 0.601 | 3.783 | <0.001 | Yes |
|---------------------|-------|-------|--------|-----|

Comparisons for factor: **Condition within Time=10**

| <b>Comparison</b>   | <b>Diff of Means</b> | <b>t</b> | <b>P</b> | <b>P&lt;0.05</b> |
|---------------------|----------------------|----------|----------|------------------|
| -55.000 vs. CON     | 1.826                | 11.489   | <0.001   | Yes              |
| -25.000 vs. CON     | 1.267                | 7.972    | <0.001   | Yes              |
| -55.000 vs. -10.000 | 1.045                | 6.578    | <0.001   | Yes              |
| -10.000 vs. CON     | 0.780                | 4.911    | <0.001   | Yes              |
| -55.000 vs. -25.000 | 0.559                | 3.516    | 0.001    | Yes              |
| -25.000 vs. -10.000 | 0.487                | 3.062    | 0.003    | Yes              |

Comparisons for factor: **Condition within Time=15**

| <b>Comparison</b>   | <b>Diff of Means</b> | <b>t</b> | <b>P</b> | <b>P&lt;0.05</b> |
|---------------------|----------------------|----------|----------|------------------|
| -55.000 vs. CON     | 0.976                | 6.144    | <0.001   | Yes              |
| -55.000 vs. -10.000 | 0.641                | 4.036    | <0.001   | Yes              |
| -25.000 vs. CON     | 0.603                | 3.797    | 0.001    | Yes              |

Comparisons for factor: **Condition within Time=20**

| <b>Comparison</b> | <b>Diff of Means</b> | <b>t</b> | <b>P</b> | <b>P&lt;0.05</b> |
|-------------------|----------------------|----------|----------|------------------|
| -55.000 vs. CON   | 0.502                | 3.161    | 0.012    | Yes              |

## **Total Peripheral Resistance index (TPRi)**

Comparisons for factor: **Time of HUT within CON**

| <b>Comparison</b> | <b>Diff of Means</b> | <b>t</b> | <b>P</b> | <b>P&lt;0.05</b> |
|-------------------|----------------------|----------|----------|------------------|
| 20.000 vs. 5.000  | 323.072              | 4.704    | <0.001   | Yes              |
| 40.000 vs. 5.000  | 317.495              | 4.623    | <0.001   | Yes              |
| 60.000 vs. 5.000  | 311.815              | 4.540    | <0.001   | Yes              |

Comparisons for factor: **Time of HUT within Prior HDT=-10**

| <b>Comparison</b> | <b>Diff of Means</b> | <b>t</b> | <b>P</b> | <b>P&lt;0.05</b> |
|-------------------|----------------------|----------|----------|------------------|
| 60.000 vs. 5.000  | 651.920              | 9.492    | <0.001   | Yes              |
| 40.000 vs. 5.000  | 641.187              | 9.336    | <0.001   | Yes              |
| 60.000 vs. 10.000 | 571.833              | 8.326    | <0.001   | Yes              |
| 40.000 vs. 10.000 | 561.101              | 8.170    | <0.001   | Yes              |
| 20.000 vs. 5.000  | 485.162              | 7.064    | <0.001   | Yes              |
| 20.000 vs. 10.000 | 405.075              | 5.898    | <0.001   | Yes              |
| 15.000 vs. 5.000  | 378.174              | 5.506    | <0.001   | Yes              |
| 15.000 vs. 10.000 | 298.087              | 4.340    | <0.001   | Yes              |
| 60.000 vs. 15.000 | 273.746              | 3.986    | <0.001   | Yes              |
| 40.000 vs. 15.000 | 263.014              | 3.829    | 0.001    | Yes              |

Comparisons for factor: **Time of HUT within Prior HDT=-25**

| <b>Comparison</b> | <b>Diff of Means</b> | <b>t</b> | <b>P</b> | <b>P&lt;0.05</b> |
|-------------------|----------------------|----------|----------|------------------|
| 60.000 vs. 5.000  | 775.251              | 11.288   | <0.001   | Yes              |
| 40.000 vs. 5.000  | 765.740              | 11.149   | <0.001   | Yes              |
| 20.000 vs. 5.000  | 664.814              | 9.680    | <0.001   | Yes              |
| 60.000 vs. 10.000 | 646.902              | 9.419    | <0.001   | Yes              |
| 40.000 vs. 10.000 | 637.390              | 9.280    | <0.001   | Yes              |
| 20.000 vs. 10.000 | 536.465              | 7.811    | <0.001   | Yes              |
| 15.000 vs. 5.000  | 429.897              | 6.259    | <0.001   | Yes              |
| 60.000 vs. 15.000 | 345.354              | 5.028    | <0.001   | Yes              |
| 40.000 vs. 15.000 | 335.843              | 4.890    | <0.001   | Yes              |
| 15.000 vs. 10.000 | 301.547              | 4.391    | <0.001   | Yes              |
| 20.000 vs. 15.000 | 234.917              | 3.420    | 0.005    | Yes              |

Comparisons for factor: **Time of HUT within Prior HDT=-55**

| <b>Comparison</b> | <b>Diff of Means</b> | <b>t</b> | <b>P</b> | <b>P&lt;0.05</b> |
|-------------------|----------------------|----------|----------|------------------|
| 60.000 vs. 5.000  | 959.982              | 13.977   | <0.001   | Yes              |
| 40.000 vs. 5.000  | 916.422              | 13.343   | <0.001   | Yes              |
| 60.000 vs. 10.000 | 856.931              | 12.477   | <0.001   | Yes              |
| 40.000 vs. 10.000 | 813.371              | 11.843   | <0.001   | Yes              |
| 20.000 vs. 5.000  | 738.815              | 10.757   | <0.001   | Yes              |
| 20.000 vs. 10.000 | 635.765              | 9.257    | <0.001   | Yes              |
| 60.000 vs. 15.000 | 483.433              | 7.039    | <0.001   | Yes              |
| 15.000 vs. 5.000  | 476.549              | 6.939    | <0.001   | Yes              |
| 40.000 vs. 15.000 | 439.873              | 6.405    | <0.001   | Yes              |
| 15.000 vs. 10.000 | 373.498              | 5.438    | <0.001   | Yes              |
| 20.000 vs. 15.000 | 262.267              | 3.819    | 0.001    | Yes              |
| 60.000 vs. 20.000 | 221.167              | 3.220    | 0.007    | Yes              |
| 40.000 vs. 20.000 | 177.606              | 2.586    | 0.033    | Yes              |

Comparisons for factor: **Condition within Time=5**

| <b>Comparison</b>   | <b>Diff of Means</b> | <b>t</b> | <b>P</b> | <b>P&lt;0.05</b> |
|---------------------|----------------------|----------|----------|------------------|
| CON vs. -55.000     | 640.815              | 10.156   | <0.001   | Yes              |
| CON vs. -25.000     | 467.711              | 7.412    | <0.001   | Yes              |
| -10.000 vs. -55.000 | 359.329              | 5.695    | <0.001   | Yes              |
| CON vs. -10.000     | 281.487              | 4.461    | <0.001   | Yes              |
| -10.000 vs. -25.000 | 186.224              | 2.951    | 0.008    | Yes              |
| -25.000 vs. -55.000 | 173.105              | 2.743    | 0.007    | Yes              |

Comparisons for factor: **Condition within Time=10**

| <b>Comparison</b>   | <b>Diff of Means</b> | <b>t</b> | <b>P</b> | <b>P&lt;0.05</b> |
|---------------------|----------------------|----------|----------|------------------|
| CON vs. -55.000     | 690.613              | 10.945   | <0.001   | Yes              |
| CON vs. -25.000     | 492.209              | 7.801    | <0.001   | Yes              |
| CON vs. -10.000     | 354.248              | 5.614    | <0.001   | Yes              |
| -10.000 vs. -55.000 | 336.365              | 5.331    | <0.001   | Yes              |
| -25.000 vs. -55.000 | 198.404              | 3.144    | 0.005    | Yes              |
| -10.000 vs. -25.000 | 137.961              | 2.186    | 0.032    | Yes              |

Comparisons for factor: **Condition within Time=15**

| <b>Comparison</b>   | <b>Diff of Means</b> | <b>t</b> | <b>P</b> | <b>P&lt;0.05</b> |
|---------------------|----------------------|----------|----------|------------------|
| CON vs. -55.000     | 361.242              | 5.725    | <0.001   | Yes              |
| -10.000 vs. -55.000 | 260.953              | 4.136    | <0.001   | Yes              |
| CON vs. -25.000     | 234.789              | 3.721    | 0.001    | Yes              |

Comparisons for factor: **Condition within Time=20**

| <b>Comparison</b> | <b>Diff of Means</b> | <b>t</b> | <b>P</b> | <b>P&lt;0.05</b> |
|-------------------|----------------------|----------|----------|------------------|
| CON vs. -55.000   | 225.072              | 3.567    | 0.004    | Yes              |
